# Supplementary material for: Lung volume calculated from electrical impedance tomography in ICU patients at different PEEP levels
Source: Springer Nature journal article supplement (doi:10.1007/s00134-009-1512-6), 2009-06-09
Supplement: MOESM1 [file 8119446]

1  
2  
3  
4  
5  
6  
7  
8  
9  
10  
11  
12  
13  
14  
15  
16  
17  
18  
19  
20  
21  
22  
23  
24  
25  
26  
27  
28  
29  
30  
31  
32  
33  
34  
35  
36  
37  
38  
39  
40  
41  
42  
43  
44  
45  
46  
47  
48  
49  
50  
51  
52  
53  
54  
55  
56  
57  
58  
59  
60

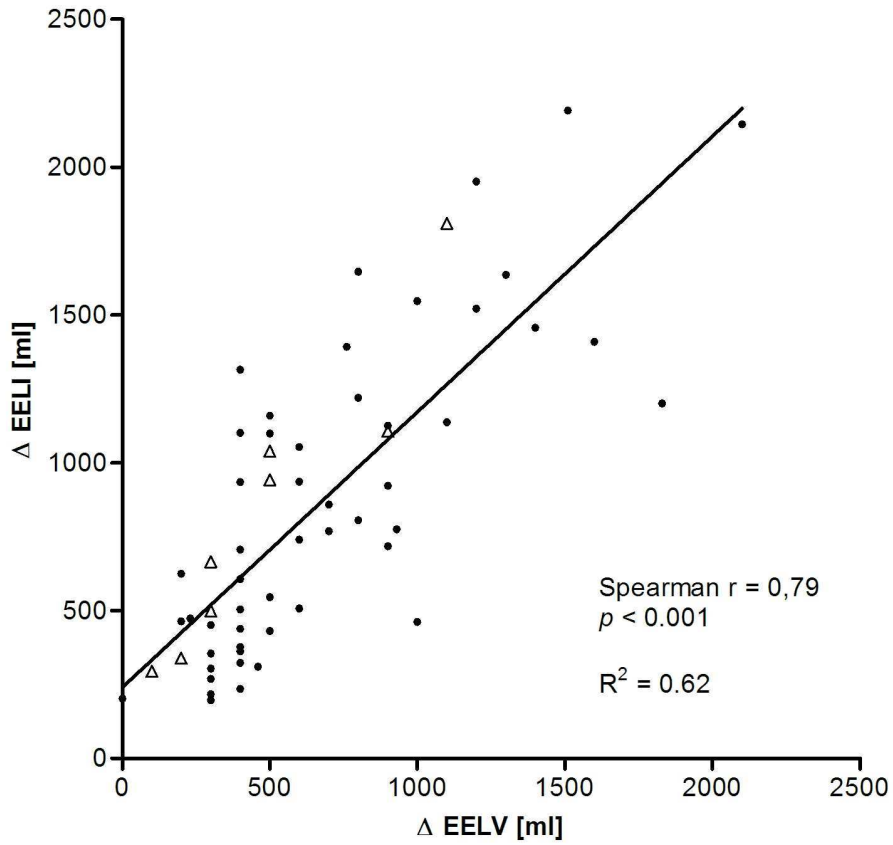

Figure A: Linear correlation between  $\Delta$ end-expiratory lung volume ( $\Delta$ EELV) measured with a multibreath nitrogen washout technique and  $\Delta$ lung volume obtained from changes in end-expiratory lung impedance (EELI) calculated with the slope between tidal impedance variation and tidal volume at 5 cm H<sub>2</sub>O PEEP. Changes in EELV and EELI were calculated from the lowest measured PEEP level (0 or 5 cm H<sub>2</sub>O). Open triangles represent patients on assisted spontaneous breathing and black dots represent patients on controlled ventilation.  
131x121mm (300 x 300 DPI)
